# Supplementary material
Source: PubMed Central journal article supplement (PMC9346192)

## Supplementary Figure 1

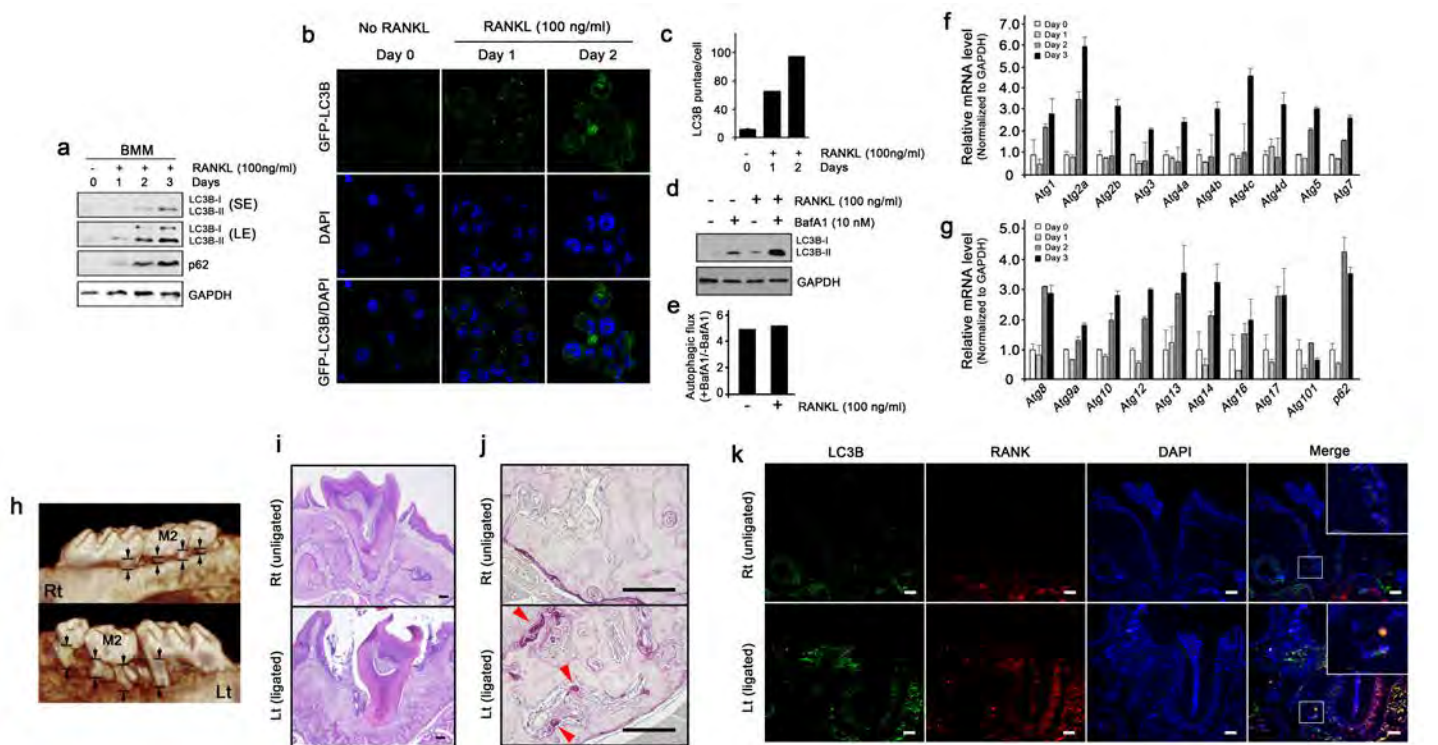

**Supplementary Figure 1. Autophagy is induced during osteoclast differentiation.** (a) Western blotting against LC3B, p62, and GAPDH in BMMs treated with RANKL (100 ng/ml) and M-CSF ( $10^4$  U/ml) in a time-dependent manner. (b) Confocal microscopy for the fluorescent punctae in GFP-LC3B-overexpressing RAW 264.7 cells treated with RANKL (100 ng/ml). (c) Quantification of the fluorescent punctae per cell ( $n=50$ ). (d) Western blotting against LC3B in BMMs treated with RANKL/M-CSF and bafilomycin A1 (BafA1, 10 nM) for 1 day. (e) Quantification of autophagic flux using ImageJ from 3-independent Western blotting. (f,g) Real-time qPCR for autophagy-related genes in BMMs treated with RANKL/M-CSF in a time-dependent manner ( $n=3$ ). (h) Lateral  $\mu$ CT views from the buccal sides spanning from the first to the third maxillary molars. (i) H&E staining of the secondary maxillary molars from the unligated side (left panel) and the ligated side (right panel) (j) TRAP staining of the unligated (upper panel) and ligated (lower panel) tooth areas obtained from the mouse maxilla in the ligature-induced periodontitis model. Arrow indicates the TRAP+ multinucleated osteoclasts. Bar = 100  $\mu$ m. (k) Immunofluorescent staining for LC3B and RANK at the unligated (upper panel) and ligated (lower panel) tooth areas obtained from the mouse maxilla. Bar = 200  $\mu$ m.

Supplementary Figure 2

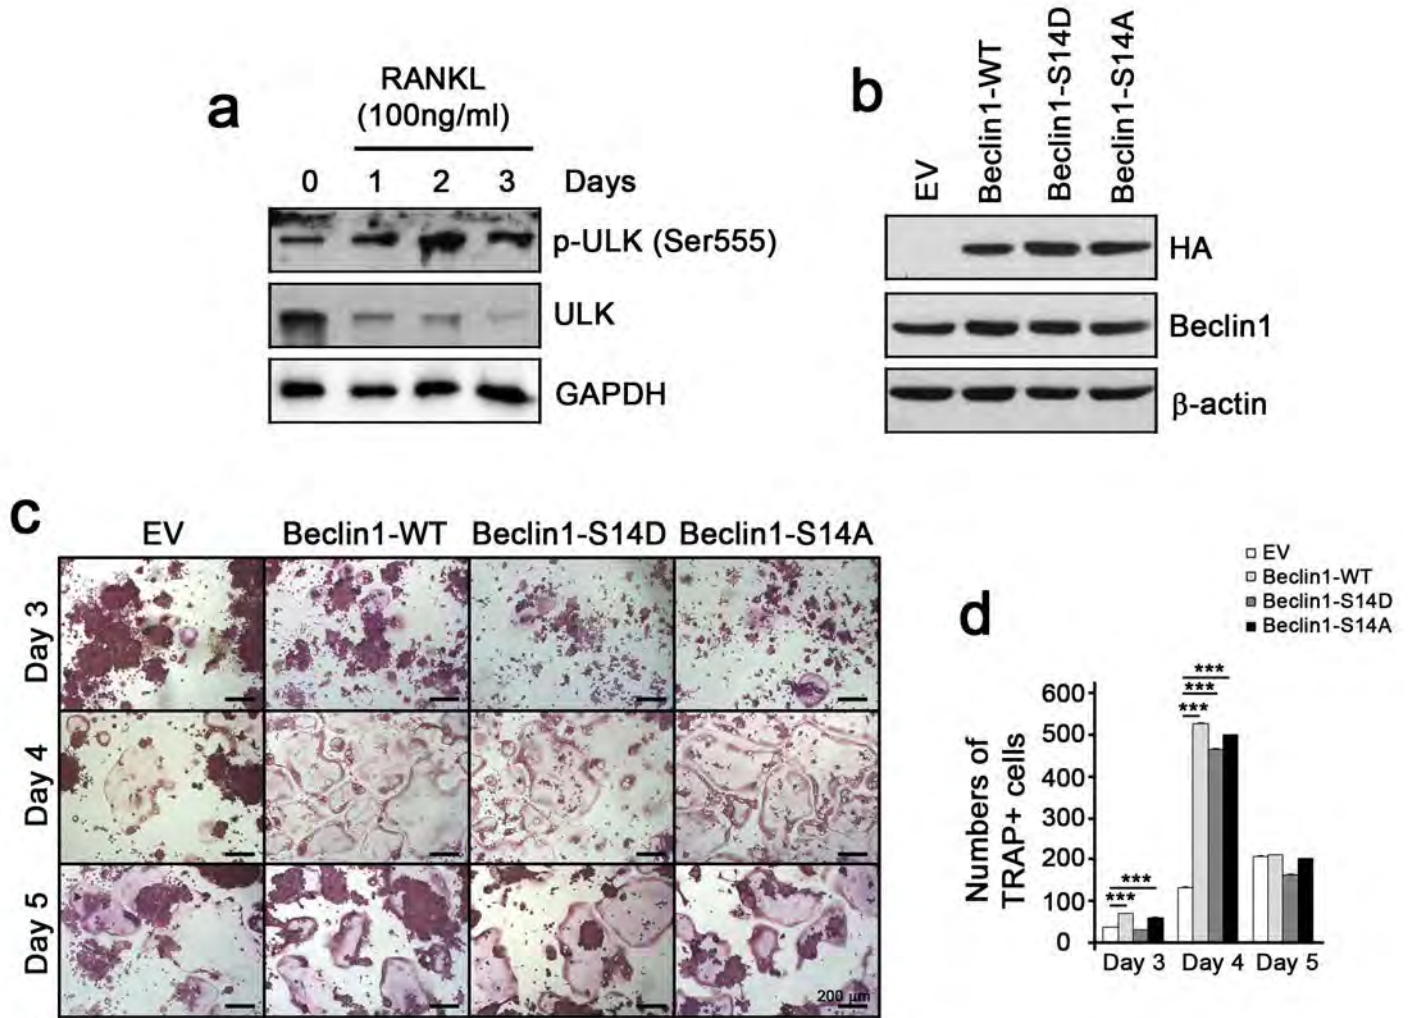

**Supplementary Figure 2. Phosphorylation of Beclin1 at S14 is dispensable in RANKL-induced osteoclast differentiation.** (a) Western blotting for p-ULK (Ser555), ULK and GAPDH in RANKL-treated RAW 264.7 cells. (b) Western blotting against HA, Beclin1, and  $\beta$ -actin in RAW 264.7 cells infected with retroviruses harboring empty vector (EV) or wildtype Beclin1 (Beclin1-WT), constitutively phosphorylated mutant Beclin1 at S14 (Beclin1-S14D), and phosphorylation incompetent mutant Beclin1 at S14 (Beclin1-S14A). (c) TRAP staining following RANKL treatment on RAW 264.7 cells for 3, 4 and 5 days. Bar = 200  $\mu$ m. (d) Quantification of TRAP+ cells.

Supplementary Figure 3

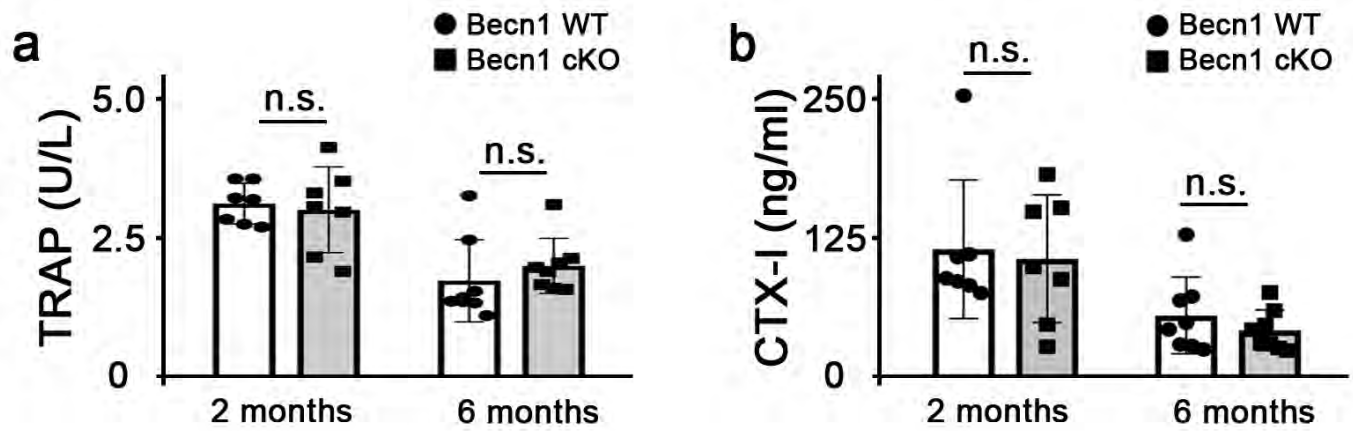

**Supplementary Figure 3. The serum amounts of TRAP and CTX-I in the Becl1 cKO mice.** (a) TRAP ELISA was performed from serum obtained from Becl1 WT and cKO mice. (b) CTX-I ELISA was performed from serum obtained from Becl1 WT and cKO mice.

**Supplementary Figure 4**

**CtsK**

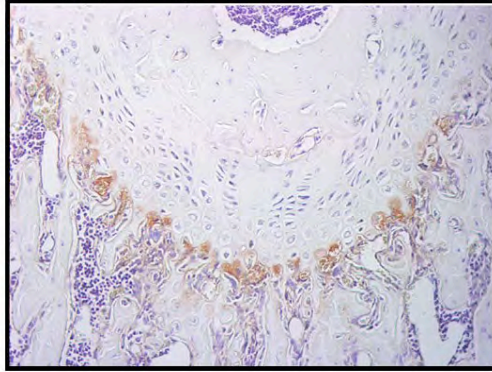

**Supplementary Figure 4. CtsK is expressed at the hypertrophic zone of the cartilage.**  
Immunohistochemical staining against CtsK.

Supplementary Figure 5: Uncut raw Western data

Figure 1a

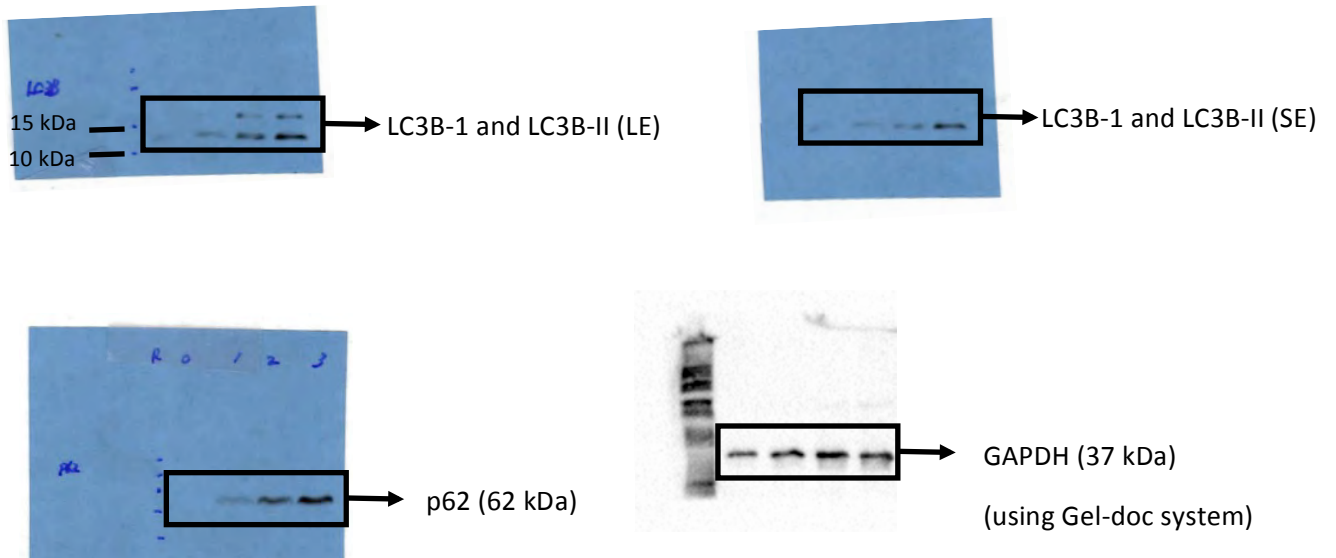

Figure 1d

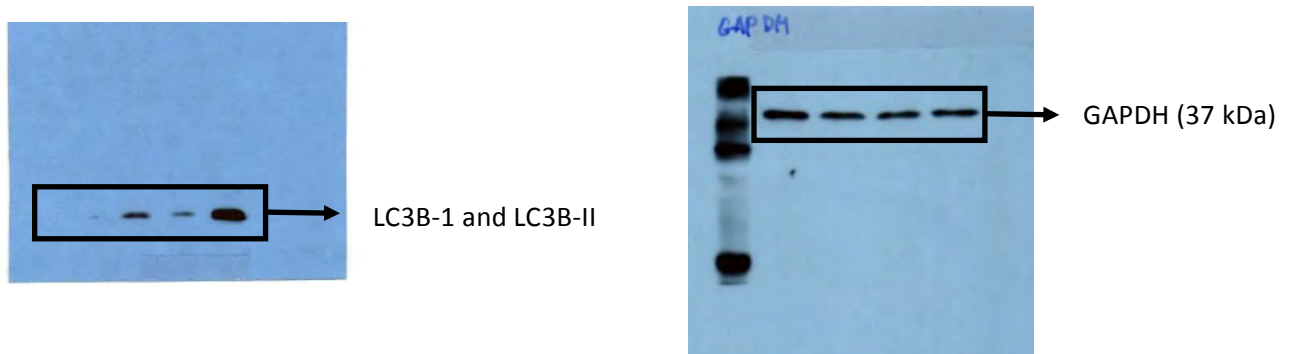

**Figure 2b**

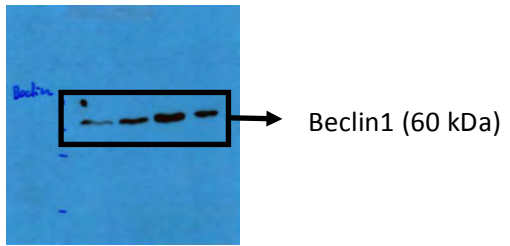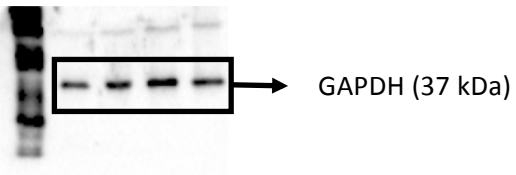

**Figure 2c**

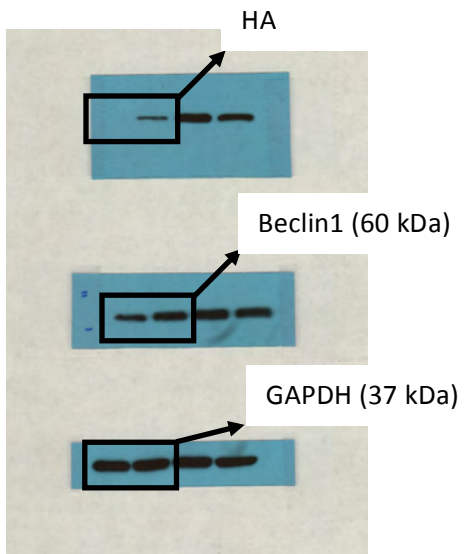

**Figure 2k**

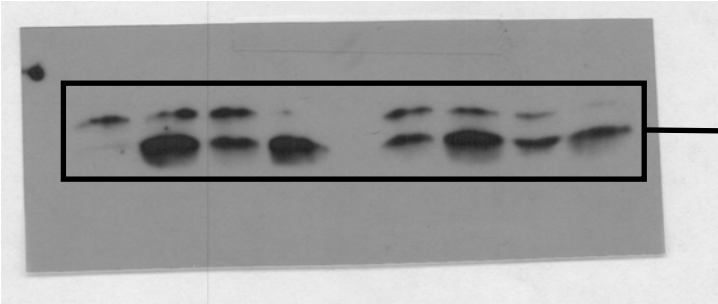

LC3B-1 and LC3B-II

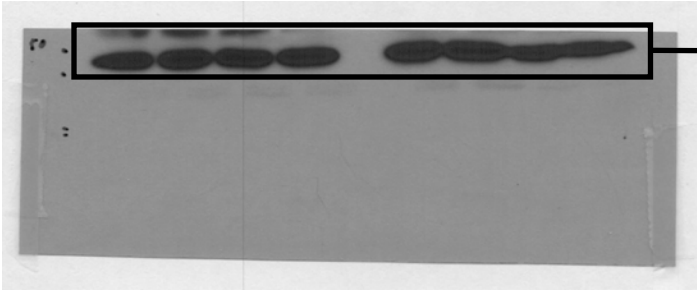

$\beta$ -actin (42 kDa)

**Figure 3a**

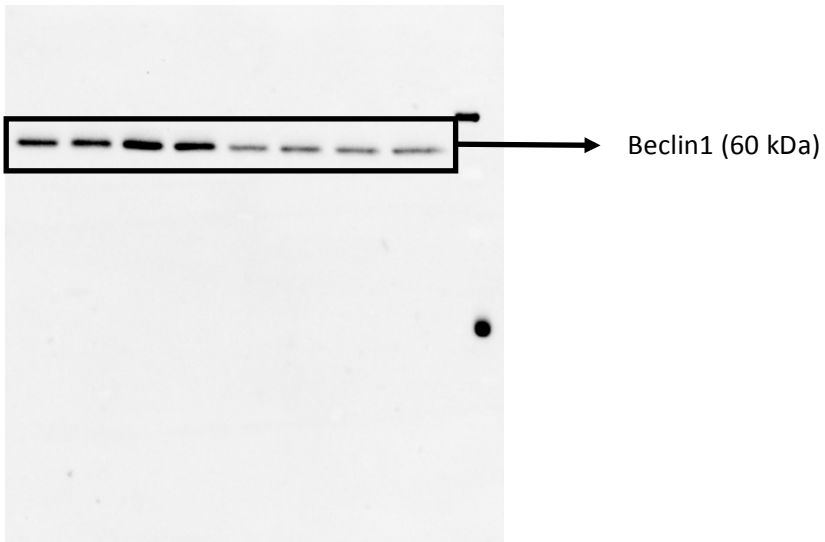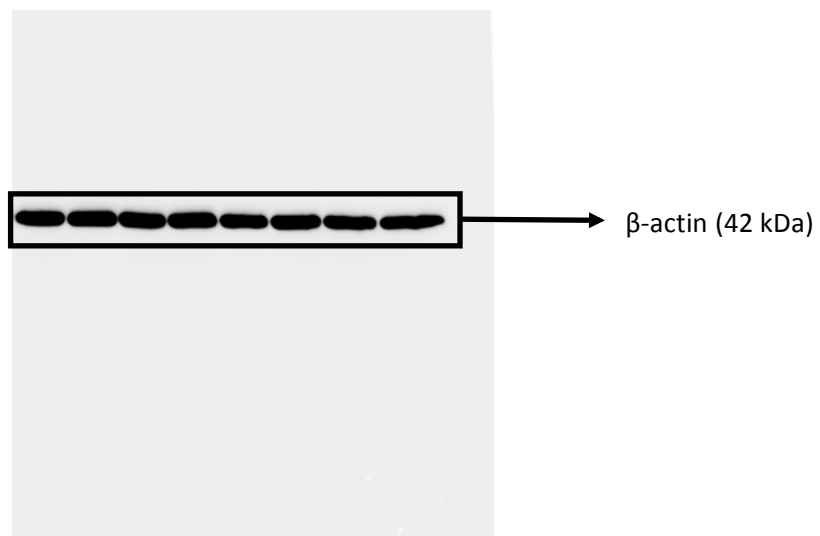



**Figure 5b**

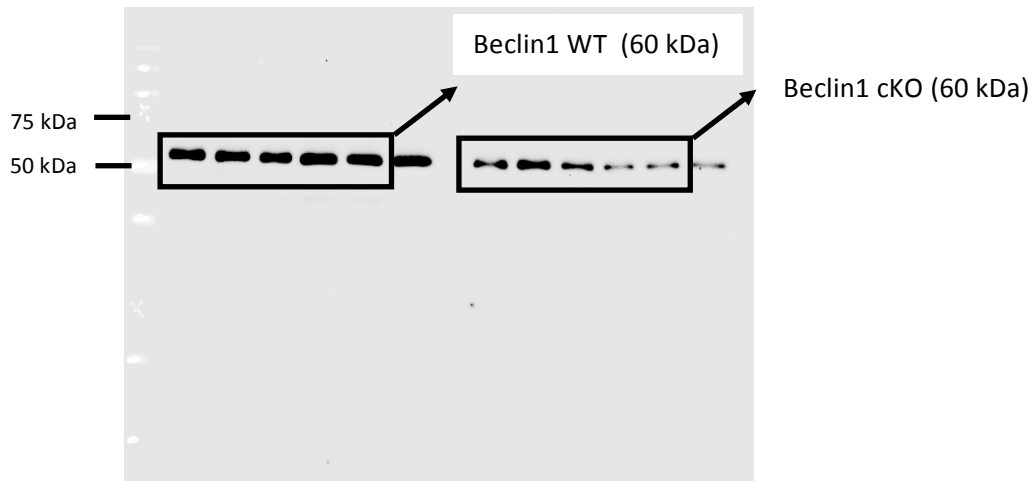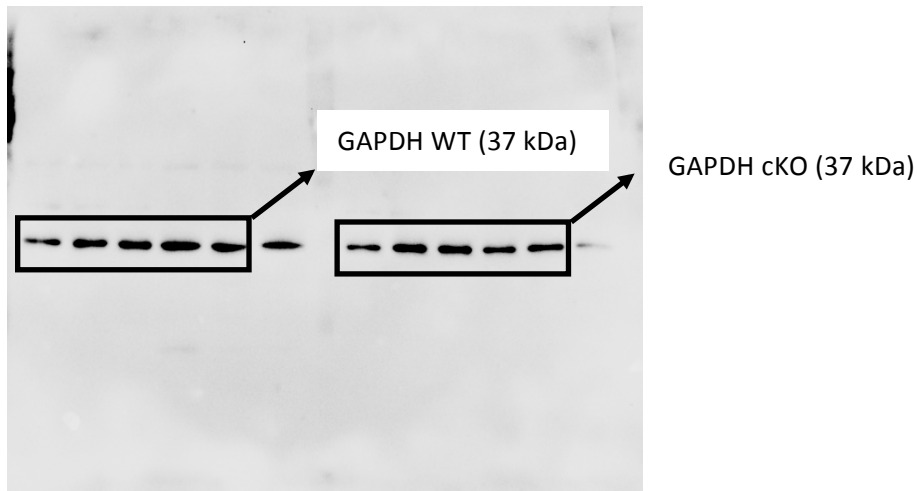

**Figure 5i**

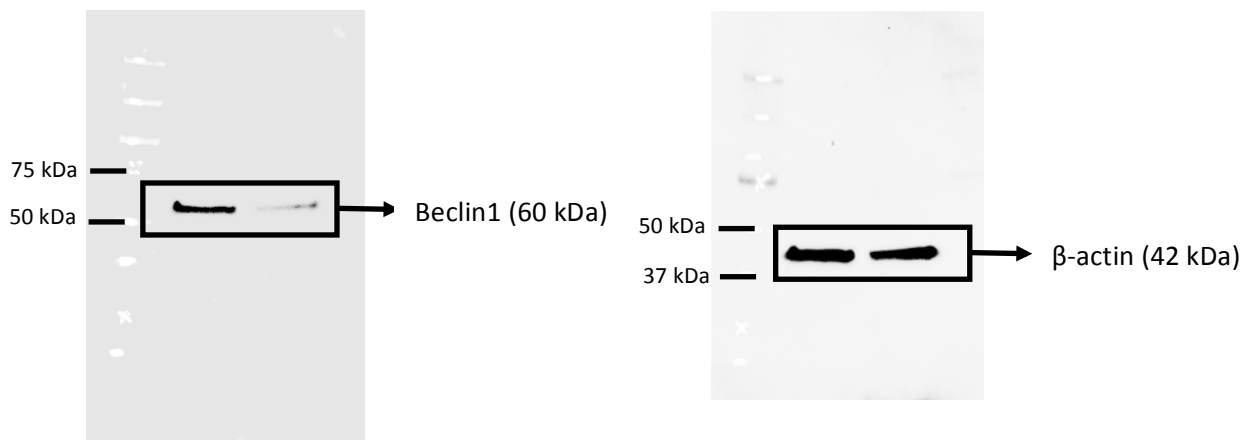

**Figure 5j**

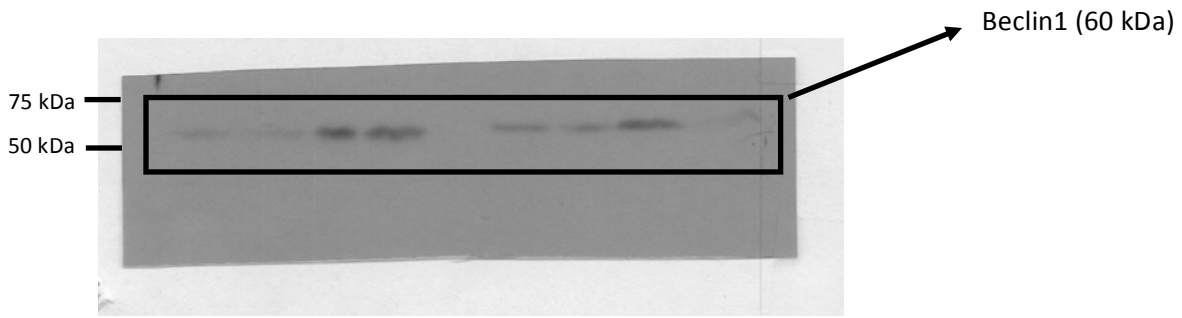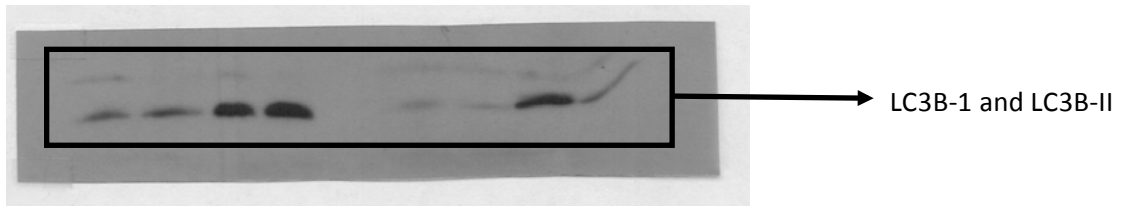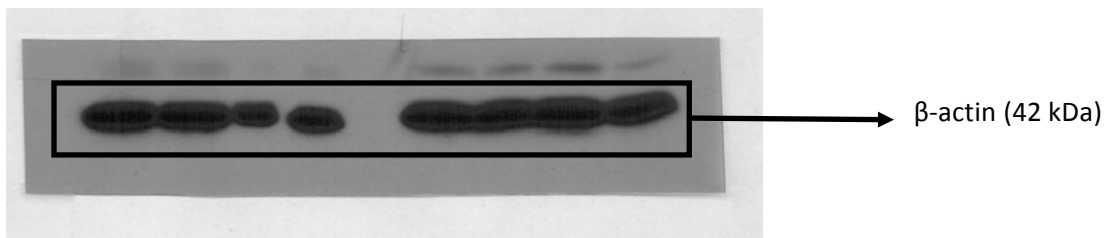

Figure 6a

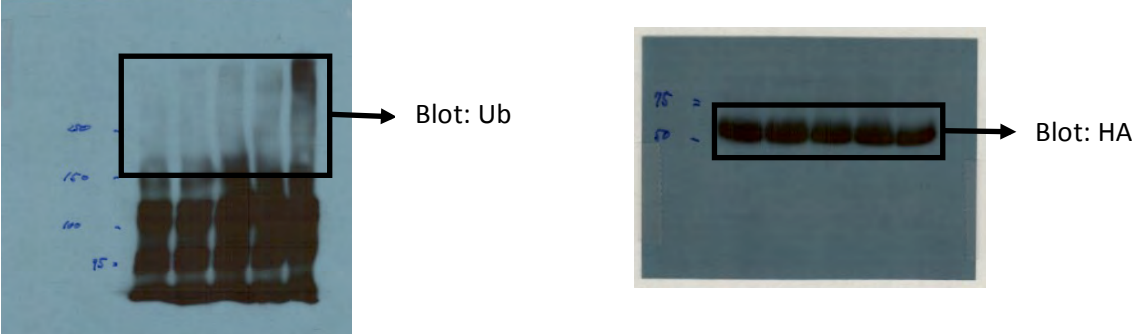

Figure 6c

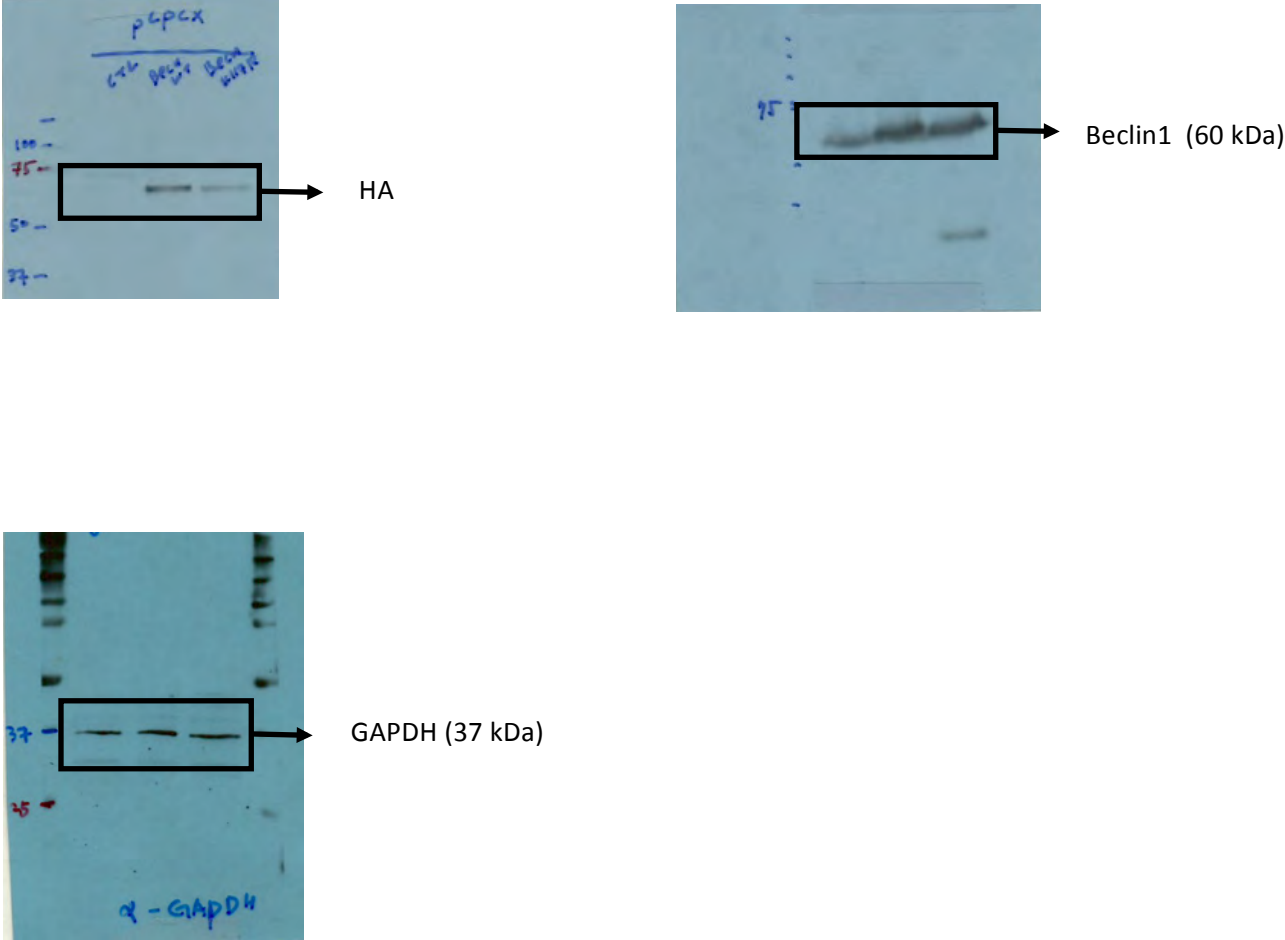

Figure 6f

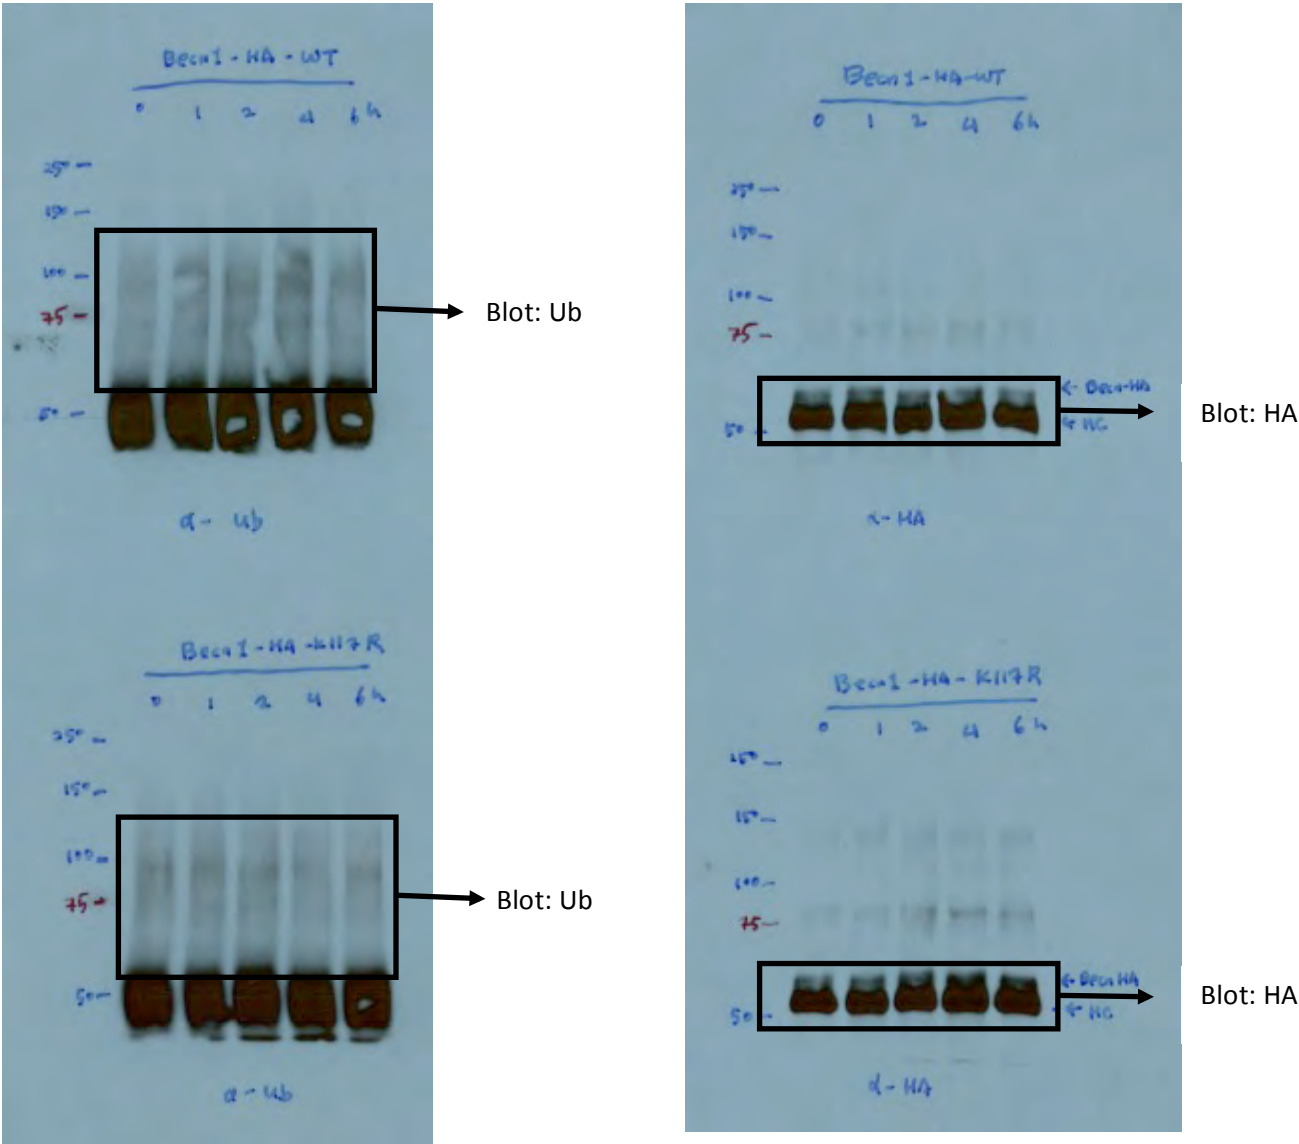

**Figure 6g**

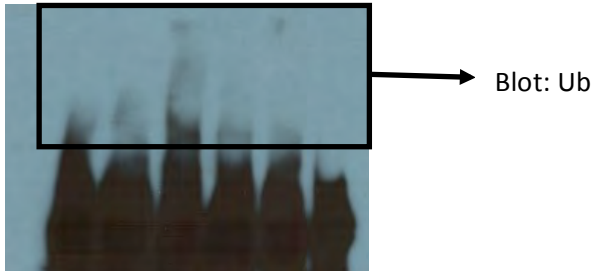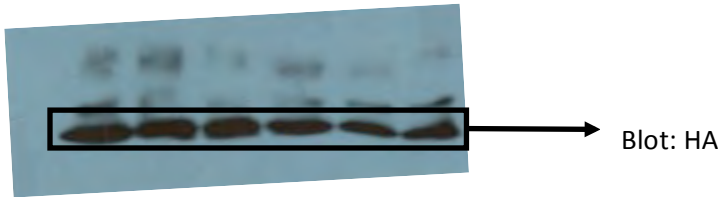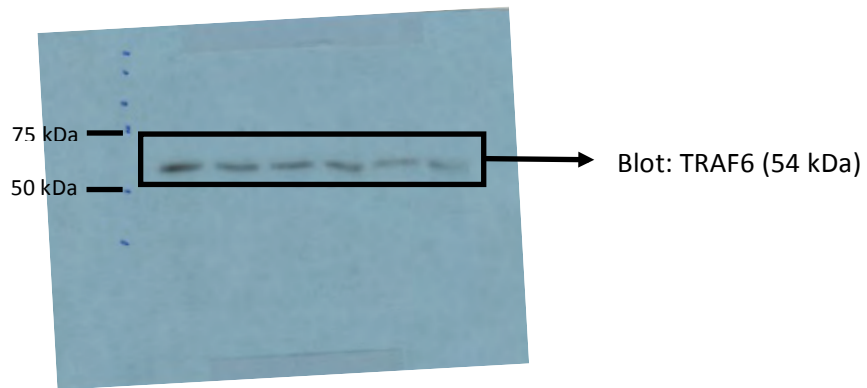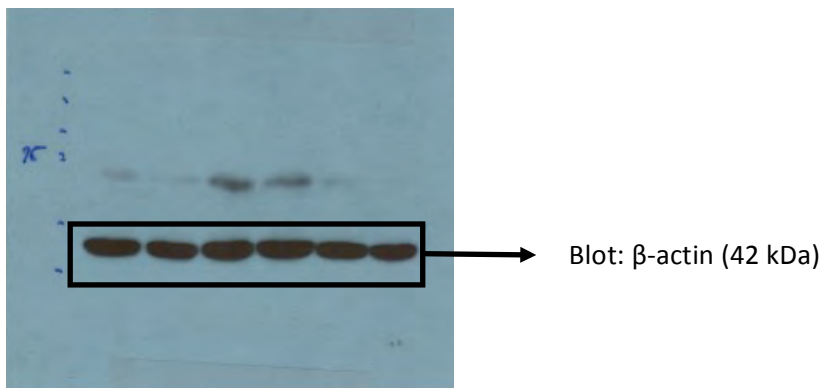

Supplement: NIHMS1028455-supplement-Supp_info.pdf [file NIHMS1028455-supplement-Supp_info.pdf]
